# Supplementary material
Source: PubMed Central journal article supplement (PMC4089192)

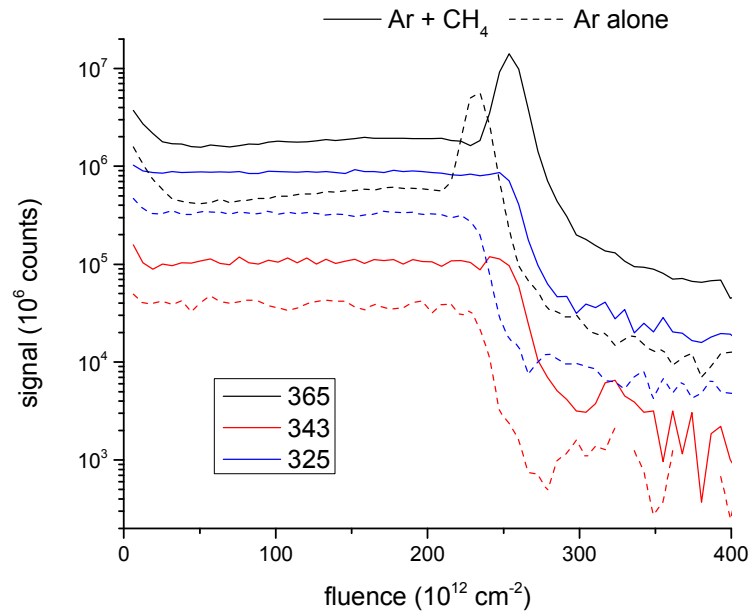

Ar alone:

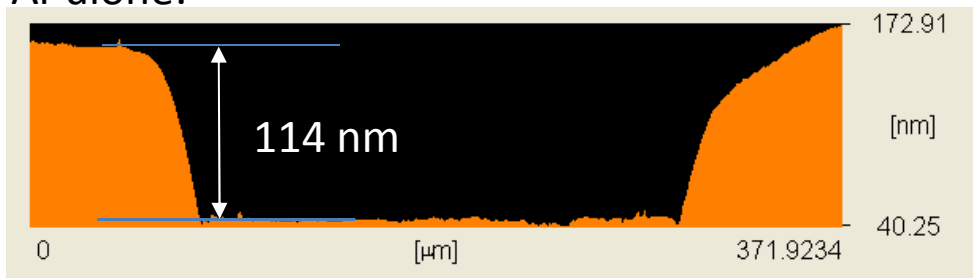

$$Y_V = \frac{114 \text{ nm}}{2.32 \times 10^{14} \text{ cm}^{-2}} = 49 \text{ nm}^3$$

Ar + CH<sub>4</sub>:

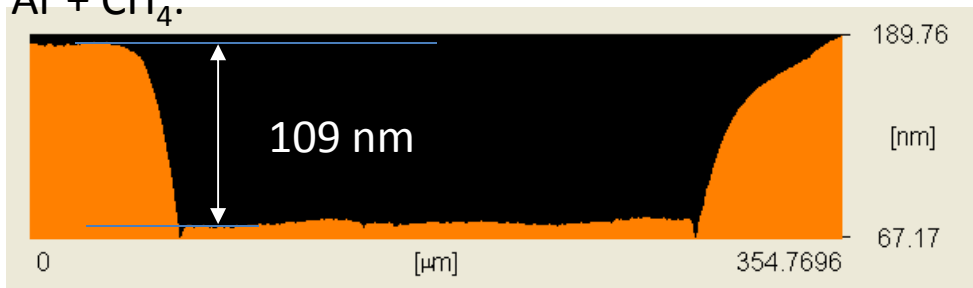

$$Y_V = \frac{109 \text{ nm}}{2.53 \times 10^{14} \text{ cm}^{-2}} = 43 \text{ nm}^3$$

Supplement: NIHMS546483-supplement-Supplementary.pdf [file NIHMS546483-supplement-Supplementary.pdf]
